# Supplementary material for: Particle formation and growth at five rural and urban sites
Source: Copernicus journal article supplement (doi:10.5194/acp-10-7979-2010), 2010-08-27
Supplement: Supplementary file 1 [file acp-10-7979-2010-supplement.pdf]

## **Supplemental Material**

### **Particle Formation and Growth at Five Rural and Urban Sites**

**Cheol-Heon Jeong<sup>1</sup>, Greg J. Evans<sup>1</sup>, Maygan L. McGuire<sup>1</sup>, Rachel Y. -W. Chang<sup>1,4</sup>,  
Jonathan P. D. Abbatt<sup>1,4</sup>, Kristina Zeromskiene<sup>2</sup>, Michael Mozurkewich<sup>2</sup>, Shao-Meng Li<sup>3</sup>,  
W. Richard Leitch<sup>3</sup>**

<sup>1</sup> Southern Ontario Centre for Atmospheric Aerosol Research, University of Toronto, 200 College Street, Toronto, Ontario, M5S 3E5, Canada

<sup>2</sup> Chemistry Department and Centre for Atmospheric Chemistry, York University, 4700 Keele Street, Toronto, Ontario, M3J 1P3, Canada

<sup>3</sup> Science and Technology Branch, Environment Canada, 4905 Dufferin Street, Toronto, Ontario, M3H 5T4, Canada

<sup>4</sup> Department of Chemistry, University of Toronto, 80 St. George Street, Toronto, Ontario M5S 3H6, Canada

Correspondence to: Greg J. Evans (greg.evans@utoronto.ca)

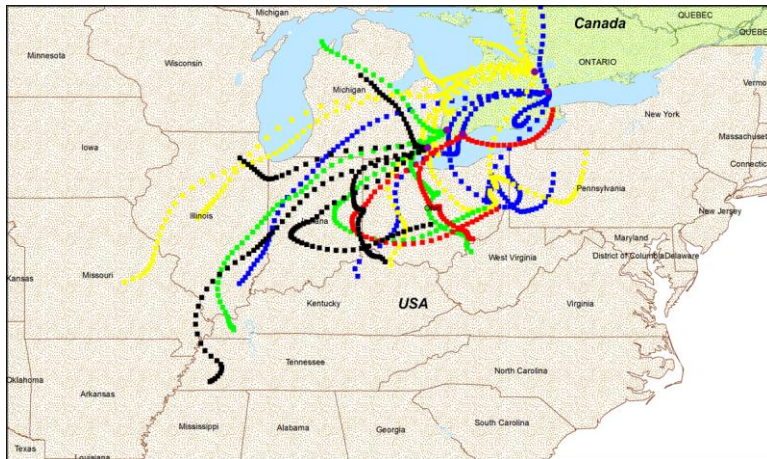

**Fig. S1.** 48-hr back trajectories of all Class N events (non- event) at the five monitoring sites. Back trajectory data from June 28 to June 30 were not available.

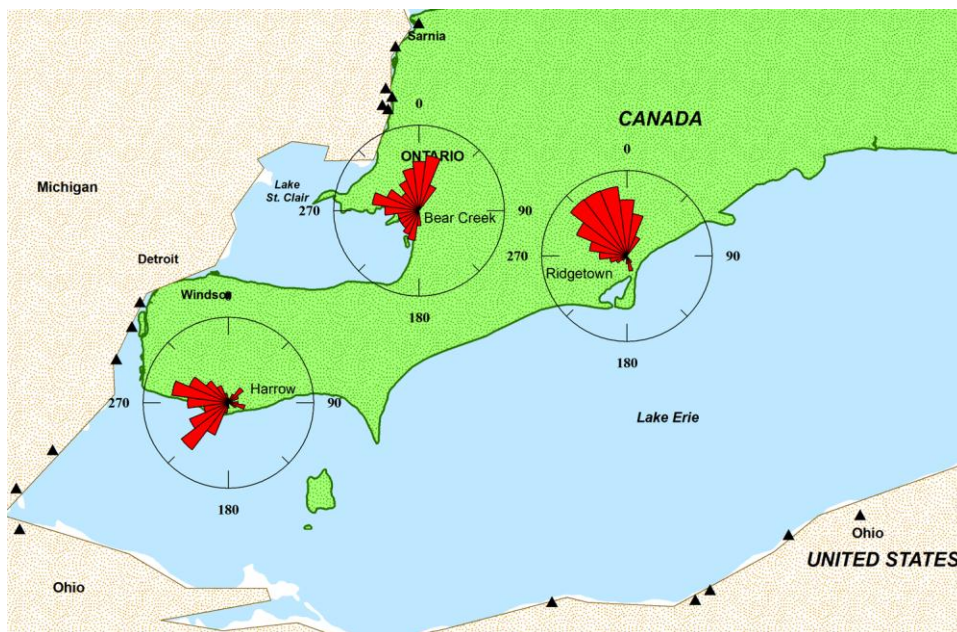

**Fig. S2.** CPF plots for particle number concentrations in the size range of 14 nm-25 nm during Class II event days: Harrow (a), Ridgetown (b), and Bear Creek (c). Triangles represent the locations of coal-fired power plants. All time periods having a wind speed less than  $1 \text{ m s}^{-1}$  were excluded from the analysis.
